# Supplementary material for: Single-crystal growth of layered metallic materials of TiTe2 based on a polytelluride flux method
Source: Royal Society of Chemistry journal article supplement (doi:10.1039/d3ce00619k), 2023-01-01
Supplement: d3ce00619k1.pdf [file d3ce00619k1.pdf]

## Supporting Information

# Single crystal growth of layered metallic materials $\text{TiTe}_2$ based on a polytelluride flux method

Xiaojing Feng,<sup>a</sup> Zhiqi Li,<sup>a</sup> Guangda Chen,<sup>a</sup> Haoyu Yue,<sup>a</sup> Yan Gao,<sup>a</sup> Xiankun Zhang,<sup>b</sup> Zhongnan Guo,<sup>\*a</sup> and  
Wenxia Yuan<sup>a</sup>

<sup>a</sup> Department of Chemistry, School of Chemistry and Biological Engineering, University of Science and  
Technology Beijing, Beijing, 100083, China

<sup>b</sup> Academy for Advanced Interdisciplinary Science and Technology, School of Materials Science and  
Engineering, University of Science and Technology Beijing, Beijing 100083, China.

\*E-mail: [guozhongn@ustb.edu.cn](mailto:guozhongn@ustb.edu.cn)

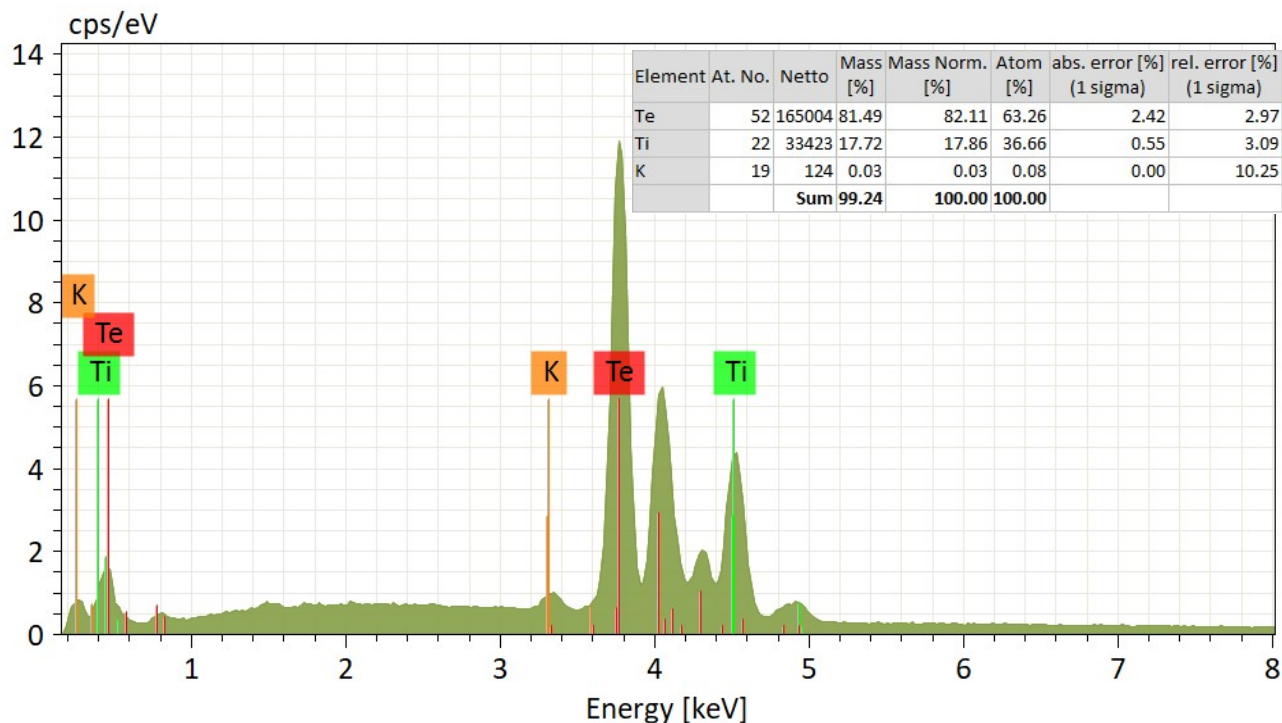

**Fig. S1** The EDS spectrum of  $\text{TiTe}_2$  from polytelluride flux in this work.

**Table. S1** Work functions of the VB group TMDs reported in previous literatures.

| Sample                         | Work function (eV) | methods            | reference |
|--------------------------------|--------------------|--------------------|-----------|
| $\text{VS}_2$                  | 4.37               | KPFM* <sup>1</sup> | [1]       |
| 1T- $\text{VSe}_2$ (bulk)      | 5.76               | TCS* <sup>2</sup>  | [2]       |
| 1T- $\text{VSe}_2$ (monolayer) | 5.52               | TCS                | [3]       |
| $\text{NbSe}_2$                | 5.9                | UPS* <sup>3</sup>  | [4]       |
| $\text{NbS}_2$                 | 4.75~4.9           | UPS                | [5]       |
| 1T- $\text{TaS}_2$             | 5.7                | TCS                | [6]       |

KPFM\*<sup>1</sup>: Kelvin probe force microscopy

TCS\*<sup>2</sup>: Target-current spectroscopy

UPS\*<sup>3</sup>: Ultraviolet photoelectron spectroscopy

- [1] Q. Ji, C. Li, J. Wang, J. Niu, Y. Gong, Z. Zhang, Q. Fang, Y. Zhang, J. Shi, L. Liao, X. Wu, L. Gu, Z. Liu, Y. Zhang, *Nano Letters* **2017**, *17*, 4908.
- [2] R. Claessen, I. Schafer, M. Skibowski, *Journal of Physics: Condensed Matter* **1990**, *2*, 10045.
- [3] Z.-L. Liu, X. Wu, Y. Shao, J. Qi, Y. Cao, L. Huang, C. Liu, J.-O. Wang, Q. Zheng, Z.-L. Zhu, K. Ibrahim, Y.-L. Wang, H.-J. Gao, *Science Bulletin* **2018**, *63*, 419.
- [4] T. Shimada, F. S. Ohuchi, B. A. Parkinson, *Japanese Journal of Applied Physics* **1994**, *33*, 2696.

- [5] H. Bark, Y. Choi, J. Jung, J. H. Kim, H. Kwon, J. Lee, Z. Lee, J. H. Cho, C. Lee, *Nanoscale* **2018**, *10*, 1056.
- [6] R. Claessen, B. Burandt, H. Carstensen, M. Skibowski, *Physical Review B* **1990**, *41*, 8270.
